# Supplementary material for: The Application of Principal Component Analysis (PCA) for the Optimization of the Conditions of Fabrication of Electrospun Nanofibrous Membrane for Desalination and Ion Removal
Source: MDPI journal article supplement (doi:10.3390/membranes11120979), 2021-12-13
Supplement: s1 [file s1]

*Supplementary Information*

# **The Application of Principal Component Analysis (PCA) for the Optimization of the Conditions of Fabrication of Electrospun Nanofibrous Membrane for Desalination and Ion Removal**

**Khaled Younes \*, Omar Mouhtady, Hamdi Chaouk, Emil Obeid, Rabih Roufayel, Ahmad Moghrabi and Nimer Murshid**

College of Engineering and Technology, American University of the Middle East, Kuwait;  
omar.mouhtady@aum.edu.kw (O.M.); Hamdi-Chaouk@aum.edu.kw (H.C.); emil.obeid@aum.edu.kw (E.O.);  
rabih.roufayel@aum.edu.kw (R.R.); ahmad.moghrabi@aum.edu.kw (A.M.); nimer.murshid@aum.edu.kw (N.M.)

\* Correspondence: Khaled.younes@aum.edu.kw

**Table S1:** Published results on single polymer/layer ENMs for desalination and ion removal (from Sanaeepur et al. [22])

| Dope                                              |    | V<br>(kV) | Q <sub>d</sub><br>(mL·h <sup>-1</sup> ) | T-to-<br>C(cm) | N<br>(mm) | d <sub>p</sub><br>(μm) | δ<br>(μm) | WCA<br>(°) | LEP<br>(kPa) | ε (%) |
|---------------------------------------------------|----|-----------|-----------------------------------------|----------------|-----------|------------------------|-----------|------------|--------------|-------|
| • P: PMMA<br>(20 wt%)<br>• S:<br>DMF + acetone    | 1  | 18        | 9.6                                     | 30             | -         | 0.41                   | 161       | 164        | 227          | 83    |
| • P: SAN<br>(22.5 wt%)<br>• S: DMF                | 2  | 18        | 16.2                                    | 30             | 0.68      | 0.18                   | 105       | 133        | 118          | 70    |
| • P: PS (18 wt%)<br>• S: DMF                      | 3  | 18        | 7.02                                    | 30             | 0.83      | 0.56                   | 65        | 154        | 38           | 74    |
| • P: PVDF<br>+ TBAC + FA<br>• S:<br>DMF + acetone | 4  | 30        | 1                                       | 15             | -         | 0.235                  | 60        | 137        | 230          | 70    |
| • P: PAN<br>(10 wt%)<br>• S: DMF                  | 5  | 10        | 0.5                                     | -              | 0.8       | -                      | -         | -          | -            | -     |
| • M: keratin (15 wt%)<br>• S: formic acid         | 6  | 25        | 0.06                                    | 20             | 0.2       | -                      | 50        | -          | -            | 90    |
| • P: PAN (2,6, 10 & 12 wt%)<br>• S: DMF           | 7  | 17.5      | 0.6                                     | 10             | 0.2       | -                      | -         | -          | -            | -     |
| • P: PTFE<br>emulsion + PVA<br>• S: Water         | 8  | 15        | -                                       | 15             | -         | -                      | 156       | 150        | 165          | 79.8  |
| • P: matrimid (18 wt%)<br>• S: NMP                | 9  | 30        | 1                                       | 17             | 0.26      | 2.25                   | -         | 130        | -            | -     |
| • P: matrimid (25 wt%)<br>• S: DMF +<br>acetone   | 10 | 24        | 1.23                                    | 27.7           | 0.6       | -                      | -         | -          | 35           | -     |
| • P: PVDF (5-15 wt%)<br>• S: DMF<br>+acetone      | 11 | 24        | -                                       | 15             | -         | 0.545                  | 71        | 136        | -            | 54    |
| • P: PS (20 wt%)<br>• S: DMF                      | 12 | 18        | 0.1                                     | 17             | 0.83      | 0.235                  | -         | 145.5      | -            | 75    |
| • P: PS (18 wt%)<br>• S: DMF                      | 13 | 18        | 0.1                                     | 17             | 0.83      | 5.1                    | -         | 128        | 121          | 75    |
| • P: PVDF (18 wt%)<br>• S: DMF                    | 14 | 18        | 2                                       | 18             | -         | 0.32                   | 150       | -          | -            | 76    |

|                                                            |    |    |     |    |       |      |     |     |      |    |
|------------------------------------------------------------|----|----|-----|----|-------|------|-----|-----|------|----|
| • P: PAN (10-12 wt%)<br>• S: DMF                           | 15 | 20 | 0.2 | -  | 0.521 | -    | -   | 37  | -    | -  |
| • P: PAN (12 wt%)<br>• S: DMAc                             | 16 | 15 | 1   | 15 | 0.3   | -    | 90  | -   | -    | 89 |
| • P: PAN (8-12 wt%)<br>• S: DMF                            | 17 | 16 | 0.9 | -  | 0.6   | 0.55 | 190 | 130 | -    | -  |
| • P: PVDF (18 wt%)<br>• S: DMF                             | 18 | 18 | 2   | 18 | -     | -    | 150 | -   | -    | -  |
| • P: PAN (10 and 15 wt%)<br>• S: DMF                       | 19 | 20 | 1   | 15 | 0.5   | -    | -   | -   | -    | -  |
| • P: PVDF-HFP (14 wt%)<br>• S: DMF + acetone               | 20 | 20 | 1   | 15 | 0.51  | -    | 350 | -   | -    | -  |
| • P: PVDF-HFP (14 wt%) + Polypyrrole<br>• S: DMF + acetone | 21 | 20 | 1   | 15 | 0.51  | -    | 350 | -   | -    | -  |
| • P: PSf (20 wt %)<br>• S: DMF                             | 22 | 12 | 4   | 15 | 0.21  | 2.9  | 135 | -   | 12.4 | -  |
| • P: PVDF (15 wt%)<br>• S: DMAc + acetone                  | 23 | 15 | 2   | 15 | 0.21  | 7.3  | 300 | 145 | -    | -  |

**Table S2.** Published results on dual and triple layer ENMs for desalination and ion removal (membrane characterization; from Sanaeepur et al. [22])

| Membrane characterization                                                                   |    |         |                         |                               |                    |                   |           |
|---------------------------------------------------------------------------------------------|----|---------|-------------------------|-------------------------------|--------------------|-------------------|-----------|
| Layers                                                                                      |    | Fd (nm) | dp<br>( $\mu\text{m}$ ) | $\delta$<br>( $\mu\text{m}$ ) | WCA ( $^{\circ}$ ) | $\varepsilon$ (%) | LEP (kPa) |
| Top: SAN (17.5 wt%) +<br>DMSO/acetone<br>Middle: -<br>Support: PAN (10 wt%) + DMF           | 1  | 300     | 0.28                    | 97                            | 155                | 76                | 169       |
| Top: HIPS (22&25 wt %) + DMF<br>Middle: SBR (8 wt%) +<br>DMF/THF<br>Support: PP             | 2  | 601     | 0.43                    | 160                           | 154                | 71                | 181       |
| Top: FAS fonctionnalized PVDF-<br>HFP<br>Middle: -<br>Support: PVDF-HFP                     | 3  | -       | 0.49                    | 111                           | 160                | 86                | 187       |
| Top: HIPS (22 wt %) +<br>DMF/acetone<br>Middle: -<br>Support: SAN (24 wt%) +<br>DMF/acetone | 4  | 536.5   | 0.43                    | 173                           | 143                | 77.8              | 135.6     |
| Top: PVDF+PDMS<br>Middle: -<br>Support: PVDF-HFB                                            | 5  | -       | 0.43                    | 88                            | 170                | 77                | 129       |
| Top: PVDF+DMF/acetone<br>Middle: -<br>Support: nonwoven fabrics                             | 6  | 133     | 1.65                    | 190                           | 140                | 66                | 43.5      |
| Top: PDMS<br>Middle: -<br>Support: PVDF-HFP (15 wt%)                                        | 7  | -       | 0.49                    | 102                           | 155.4              | 87                | 126       |
| Top: PVA (4-8 wt%)<br>Middle: -<br>Support: PP                                              | 8  | -       | 0.08                    | 48                            | 105                | -                 | -         |
| Top: PVDF-HFP (20 wt%)<br>Middle" -<br>Support: PVA, Nylon 6, PAN                           | 9  | 239.3   | 0.34                    | 128                           | 148                | 89                | 122.3     |
| Top: Chitosan + PVA (8 wt%)<br>Middle: -<br>Support: PAN                                    | 10 | 932     | 0.6                     | -                             | -                  | 87                | -         |
| Top: PVDF-HFP (15 wt%)<br>Middle: -<br>Support: PAN (8 wt%)                                 | 11 | 225     | 1.55                    | 81                            | 150                | 90                | 85.5      |

|                              |    |     |      |     |     |    |       |
|------------------------------|----|-----|------|-----|-----|----|-------|
| <b>Top: Silica + FS10</b>    |    |     |      |     |     |    |       |
| <b>Middle: -</b>             | 12 | 180 | 0.83 | 72  | 150 | 80 | 150   |
| <b>Support: PVDF</b>         |    |     |      |     |     |    |       |
| <b>Top: Polyaniline</b>      |    |     |      |     |     |    |       |
| <b>Middle: -</b>             | 13 | 200 | -    | 50  | -   | 70 | -     |
| <b>Support: PAN</b>          |    |     |      |     |     |    |       |
| <b>Top: PVDF</b>             |    |     |      |     |     |    |       |
| <b>Middle: PVDF</b>          | 14 | -   | 0.1  | 175 | 145 | -  | 350   |
| <b>Support: PAN</b>          |    |     |      |     |     |    |       |
| <b>Top: PVDF-HFP(10 wt%)</b> |    |     |      |     |     |    |       |
| <b>Middle: -</b>             | 15 | 200 | 0.26 | 110 | 126 | 60 | 131.6 |
| <b>Support: PVDF-HFP</b>     |    |     |      |     |     |    |       |

**Table S3.** Published results on dual and triple layer ENMs for desalination and ion removal (membrane fabrication; from Sanaeepur et al. [22])

| Membrane characterization                      |   | Membrane fabrication (electrospinning) |     |    |             |                               |
|------------------------------------------------|---|----------------------------------------|-----|----|-------------|-------------------------------|
| Layers                                         |   | HV                                     | Qd  | N  | T-to-C (cm) | Qa<br>(NL.min <sup>-1</sup> ) |
| <b>Top: SAN (17.5 wt%) +<br/>DMSO/acetone</b>  | 1 | 18                                     | 5.4 | 18 | 30          | 2                             |
| <b>Middle: -</b>                               |   |                                        |     |    |             |                               |
| <b>Support: PAN (10 wt%) + DMF</b>             |   |                                        |     |    |             |                               |
| <b>Top: HIPS (22&amp;25 wt %) + DMF</b>        | 2 | 18                                     | 5.4 | 18 | 30          | 2                             |
| <b>Middle: SBR (8 wt%) +<br/>DMF/THF</b>       |   |                                        |     |    |             |                               |
| <b>Support: PP</b>                             |   |                                        |     |    |             |                               |
| <b>Top: FAS fonctionnalized<br/>PVDF-HFP</b>   | 3 | 16                                     | 0.8 | -  | 15          | 0-4                           |
| <b>Middle: -</b>                               |   |                                        |     |    |             |                               |
| <b>Support: PVDF-HFP</b>                       |   |                                        |     |    |             |                               |
| <b>Top: HIPS (22 wt %) +<br/>DMF/acetone</b>   | 4 | 20                                     | 8.1 | 18 | 35          | 3                             |
| <b>Middle: -</b>                               |   |                                        |     |    |             |                               |
| <b>Support: SAN (24 wt%) +<br/>DMF/acetone</b> |   |                                        |     |    |             |                               |
| <b>Top: PVDF+PDMS</b>                          | 5 | 18                                     | 1.5 | -  | 8           | -                             |
| <b>Middle: -</b>                               |   |                                        |     |    |             |                               |
| <b>Support: PVDF-HFB</b>                       |   |                                        |     |    |             |                               |
| <b>Top: PVDF+DMF/acetone</b>                   | 6 | 16                                     | 1.5 | 18 | 15          | -                             |
| <b>Middle: -</b>                               |   |                                        |     |    |             |                               |
| <b>Support: nonwoven fabrics</b>               |   |                                        |     |    |             |                               |
| <b>Top: PDMS</b>                               | 7 | 18                                     | 0.7 | -  | 15          | -                             |
| <b>Middle: -</b>                               |   |                                        |     |    |             |                               |
| <b>Support: PVDF-HFP (15 wt%)</b>              |   |                                        |     |    |             |                               |

|                                    |    |    |     |    |    |   |
|------------------------------------|----|----|-----|----|----|---|
| <b>Top: PVA (4-8 wt%)</b>          |    |    |     |    |    |   |
| <b>Middle: -</b>                   | 8  | 16 | 0.3 | -  | 13 | - |
| <b>Support: PP</b>                 |    |    |     |    |    |   |
| <b>Top: PVDF-HFP (20 wt%)</b>      |    |    |     |    |    |   |
| <b>Middle: -</b>                   | 9  | 21 | 0.8 | -  | 20 | - |
| <b>Support: PVA, Nylon 6, PAN</b>  |    |    |     |    |    |   |
| <b>Top: Chitosan + PVA (8 wt%)</b> |    |    |     |    |    |   |
| <b>Middle: -</b>                   | 10 | 13 | 0.2 | -  | 10 | - |
| <b>Support: PAN</b>                |    |    |     |    |    |   |
| <b>Top: PVDF-HFP (15 wt%)</b>      |    |    |     |    |    |   |
| <b>Middle: -</b>                   | 11 | 20 | 1   | 21 | 15 | - |
| <b>Support: PAN (8 wt%)</b>        |    |    |     |    |    |   |
| <b>Top: Silica + FS10</b>          |    |    |     |    |    |   |
| <b>Middle: -</b>                   | 12 | 26 | 1.2 | -  | 12 | - |
| <b>Support: PVDF</b>               |    |    |     |    |    |   |
| <b>Top: Polyaniline</b>            |    |    |     |    |    |   |
| <b>Middle: -</b>                   | 13 | 14 | 1.2 | -  | 10 | - |
| <b>Support: PAN</b>                |    |    |     |    |    |   |
| <b>Top: PVDF</b>                   |    |    |     |    |    |   |
| <b>Middle: PVDF</b>                | 14 | 16 | 2   | -  | 15 | - |
| <b>Support: PAN</b>                |    |    |     |    |    |   |
| <b>Top: PVDF-HFP(10 wt%)</b>       |    |    |     |    |    |   |
| <b>Middle: -</b>                   | 15 | 20 | 1   | 18 | 15 | - |
| <b>Support: PVDF-HFP</b>           |    |    |     |    |    |   |

Table S4. Published results on dual and triple layer ENMs for desalination and ion removal (membrane performance; from Sanaeepur et al. [22])

| Membrane characterization                  | Membrane Performance |         |        |        |       |
|--------------------------------------------|----------------------|---------|--------|--------|-------|
| Layers                                     | Feed                 | delta T | Qf     | Qp     | F     |
| <b>Top: SAN (17.5 wt%) + DMSO/acetone</b>  |                      |         |        |        |       |
| <b>Middle: -</b>                           | 35                   | 40      | 0.48   | 0.24   | 37-84 |
| <b>Support: PAN (10 wt%) + DMF</b>         |                      |         |        |        |       |
| <b>Top: HIPS (22&amp;25 wt %) + DMF</b>    |                      |         |        |        |       |
| <b>Middle: SBR (8 wt%) + DMF/THF</b>       | 100                  | 40      | 0.48   | 0.24   | 18.33 |
| <b>Support: PP</b>                         |                      |         |        |        |       |
| <b>Top: FAS fonctionnalized PVDF-HFP</b>   | 1 M NaCl             |         |        |        |       |
| <b>Middle: -</b>                           | + 20 mM              | 40      | 30 L/h | 30 L/h | 0.9-1 |
| <b>Support: PVDF-HFP</b>                   | CaCl2                |         |        |        |       |
| <b>Top: HIPS (22 wt %) + DMF/acetone</b>   |                      |         |        |        |       |
| <b>Middle: -</b>                           | -                    | 40      | 0.48   | 0.4    | 23.56 |
| <b>Support: SAN (24 wt%) + DMF/acetone</b> |                      |         |        |        |       |

|                                    |          |    |      |      |       |
|------------------------------------|----------|----|------|------|-------|
| <b>Top: PVDF+PDMS</b>              |          |    |      |      |       |
| <b>Middle: -</b>                   | -        | 40 | -    | -    | 36    |
| <b>Support: PVDF-HFB</b>           |          |    |      |      |       |
| <b>Top: PVDF+DMF/acetone</b>       | 3.5 %    |    |      |      |       |
| <b>Middle: -</b>                   | NaCl     | 60 | 4800 | 4800 | 49.3  |
| <b>Support: nonwoven fabrics</b>   | solution |    |      |      |       |
| <b>Top: PDMS</b>                   |          |    |      |      |       |
| <b>Middle: -</b>                   | -        | 40 | 0.5  | 0.5  | 34    |
| <b>Support: PVDF-HFP (15 wt%)</b>  |          |    |      |      |       |
| <b>Top: PVA (4-8 wt%)</b>          |          |    |      |      |       |
| <b>Middle: -</b>                   | -        | 20 | -    | -    | 7     |
| <b>Support: PP</b>                 |          |    |      |      |       |
| <b>Top: PVDF-HFP (20 wt%)</b>      |          |    |      |      |       |
| <b>Middle" -</b>                   | -        | 40 | -    | -    | 44484 |
| <b>Support: PVA, Nylon 6, PAN</b>  |          |    |      |      |       |
| <b>Top: Chitosan + PVA (8 wt%)</b> |          |    |      |      |       |
| <b>Middle: -</b>                   | -        | -  | -    | -    | 320   |
| <b>Support: PAN</b>                |          |    |      |      |       |
| <b>Top: PVDF-HFP (15 wt%)</b>      |          |    |      |      |       |
| <b>Middle: -</b>                   | 35       | 40 | -    | -    | 30    |
| <b>Support: PAN (8 wt%)</b>        |          |    |      |      |       |
| <b>Top: Silica + FS10</b>          |          |    |      |      |       |
| <b>Middle: -</b>                   | 3.5 wt%  | 40 | -    | -    | 24.6  |
| <b>Support: PVDF</b>               |          |    |      |      |       |
| <b>Top: Polyaniline</b>            |          |    |      |      |       |
| <b>Middle: -</b>                   | -        | -  | -    | -    | -     |
| <b>Support: PAN</b>                |          |    |      |      |       |
| <b>Top: PVDF</b>                   |          |    |      |      |       |
| <b>Middle: PVDF</b>                | 3.5 wt%  | 60 | -    | -    | 16    |
| <b>Support: PAN</b>                |          |    |      |      |       |
| <b>Top: PVDF-HFP(10 wt%)</b>       |          |    |      |      |       |
| <b>Middle: -</b>                   | -        | 30 | -    | -    | 20-22 |
| <b>Support: PVDF-HFP</b>           |          |    |      |      |       |
